# Supplementary material for: GWAS Central: a comprehensive resource for the comparison and interrogation of genome-wide association studies
Source: Springer Nature journal article supplement (doi:10.1038/ejhg.2013.274), 2013-12-04
Supplement: 41431_2014_BFejhg2013274_MOESM23_ESM.pdf [file 41431_2014_BFejhg2013274_MOESM23_ESM.pdf]

CURATION

**GWAS Source**

High-Resolution Whole-Genome Association Study of Parkinson's Disease

Domenicus M. Maraganore, Mariza de Andrade, Timothy C. Leonic, Karl Mattawa, J. Fariq, Viktor A. Rocca, P. V. Krishna Panik, Kelly A. Franz, and Dennis G. Ballinger

Department of Neurology and Health Services Research, Mayo Clinic College of Medicine, Rochester, MN, USA; Mayo Clinic College of Medicine, Rochester, MN; and Michigan State University, East Lansing, Michigan, Michigan State USA

We performed a two-tiered, whole-genome association study of Parkinson disease (PD). For tier 1, we individually genotyped 198,345 uniformly spaced and informative single-nucleotide polymorphisms (SNPs) in 443 sibling pairs discordant for PD. For tier 2a, we individually genotyped 329 PD-associated SNPs (P < .05 in tier 1) and 300 genomic control SNPs in 332 matched case-unrelated control pairs. We identified 11 SNPs that were associated with PD (P < .05) in both tier 1 and tier 2 samples and had the same direction of effect. For these SNPs, we combined data from the case-unrelated sibling pair (tier 1) and case-unrelated control pair (tier 2) samples and employed a liberalization of the sibling transmission disequilibrium test to calculate odds ratios, 95% confidence intervals, and P values. A SNP within the semaphorin 5A gene (SEMA5A) had the lowest combined P value (P = 7.42 × 10<sup>-7</sup>). The protein encoded by this gene plays an important role in neurogenesis and in neuronal apoptosis, which is consistent with existing hypotheses regarding PD pathogenesis. A second SNP tagged the PARK11 late-onset PD susceptibility locus (P = 2.52 × 10<sup>-5</sup>). In tier 2b, we also selected for genotyping, additional borderline significant (P < .05) in tier 1 but that tested a prior biological or genetic hypothesis (P < .05) in tier 2b. In analysis of the combined tier 1 and tier 2b data, the two SNPs with the lowest P values (P = 9.07 × 10<sup>-6</sup>; P = 2.96 × 10<sup>-5</sup>) tagged the PARK10 late-onset PD susceptibility locus. Independent replication across populations will clarify the role of the genomic loci tagged by these SNPs in conferring PD susceptibility.

**Introduction**

Association-based genome-wide approaches that search across over a few thousand base pair subregions from linkage disequilibrium (LD) have been used to identify genetic variants associated with many human diseases (Klein et al., 2009). Here, we report the results of a high-resolution, whole-genome association study of Parkinson disease (PD) (MIM:168600). Our findings support the existence of a genetic predisposition map for PD, and we illustrate a novel genotyping approach that can be applied to the study of other complex diseases.

**Material and Methods**

We performed a high-resolution, whole-genome association study of PD, using a two-tiered genotyping approach. In tier 1, we individually genotyped 198,345 uniformly spaced and informative single-nucleotide polymorphisms (SNPs) in 443 sibling pairs discordant for PD. For tier 2a, we individually genotyped 329 PD-associated SNPs (P < .05 in tier 1) and 300 genomic control SNPs in 332 matched case-unrelated control pairs. We identified 11 SNPs that were associated with PD (P < .05) in both tier 1 and tier 2 samples and had the same direction of effect. For these SNPs, we combined data from the case-unrelated sibling pair (tier 1) and case-unrelated control pair (tier 2) samples and employed a liberalization of the sibling transmission disequilibrium test to calculate odds ratios, 95% confidence intervals, and P values. A SNP within the semaphorin 5A gene (SEMA5A) had the lowest combined P value (P = 7.42 × 10<sup>-7</sup>). The protein encoded by this gene plays an important role in neurogenesis and in neuronal apoptosis, which is consistent with existing hypotheses regarding PD pathogenesis. A second SNP tagged the PARK11 late-onset PD susceptibility locus (P = 2.52 × 10<sup>-5</sup>). In tier 2b, we also selected for genotyping, additional borderline significant (P < .05) in tier 1 but that tested a prior biological or genetic hypothesis (P < .05) in tier 2b. In analysis of the combined tier 1 and tier 2b data, the two SNPs with the lowest P values (P = 9.07 × 10<sup>-6</sup>; P = 2.96 × 10<sup>-5</sup>) tagged the PARK10 late-onset PD susceptibility locus. Independent replication across populations will clarify the role of the genomic loci tagged by these SNPs in conferring PD susceptibility.

**Results**

We performed a two-tiered, whole-genome association study of Parkinson disease (PD). For tier 1, we individually genotyped 198,345 uniformly spaced and informative single-nucleotide polymorphisms (SNPs) in 443 sibling pairs discordant for PD. For tier 2a, we individually genotyped 329 PD-associated SNPs (P < .05 in tier 1) and 300 genomic control SNPs in 332 matched case-unrelated control pairs. We identified 11 SNPs that were associated with PD (P < .05) in both tier 1 and tier 2 samples and had the same direction of effect. For these SNPs, we combined data from the case-unrelated sibling pair (tier 1) and case-unrelated control pair (tier 2) samples and employed a liberalization of the sibling transmission disequilibrium test to calculate odds ratios, 95% confidence intervals, and P values. A SNP within the semaphorin 5A gene (SEMA5A) had the lowest combined P value (P = 7.42 × 10<sup>-7</sup>). The protein encoded by this gene plays an important role in neurogenesis and in neuronal apoptosis, which is consistent with existing hypotheses regarding PD pathogenesis. A second SNP tagged the PARK11 late-onset PD susceptibility locus (P = 2.52 × 10<sup>-5</sup>). In tier 2b, we also selected for genotyping, additional borderline significant (P < .05) in tier 1 but that tested a prior biological or genetic hypothesis (P < .05) in tier 2b. In analysis of the combined tier 1 and tier 2b data, the two SNPs with the lowest P values (P = 9.07 × 10<sup>-6</sup>; P = 2.96 × 10<sup>-5</sup>) tagged the PARK10 late-onset PD susceptibility locus. Independent replication across populations will clarify the role of the genomic loci tagged by these SNPs in conferring PD susceptibility.

**Conclusion**

We performed a two-tiered, whole-genome association study of Parkinson disease (PD). For tier 1, we individually genotyped 198,345 uniformly spaced and informative single-nucleotide polymorphisms (SNPs) in 443 sibling pairs discordant for PD. For tier 2a, we individually genotyped 329 PD-associated SNPs (P < .05 in tier 1) and 300 genomic control SNPs in 332 matched case-unrelated control pairs. We identified 11 SNPs that were associated with PD (P < .05) in both tier 1 and tier 2 samples and had the same direction of effect. For these SNPs, we combined data from the case-unrelated sibling pair (tier 1) and case-unrelated control pair (tier 2) samples and employed a liberalization of the sibling transmission disequilibrium test to calculate odds ratios, 95% confidence intervals, and P values. A SNP within the semaphorin 5A gene (SEMA5A) had the lowest combined P value (P = 7.42 × 10<sup>-7</sup>). The protein encoded by this gene plays an important role in neurogenesis and in neuronal apoptosis, which is consistent with existing hypotheses regarding PD pathogenesis. A second SNP tagged the PARK11 late-onset PD susceptibility locus (P = 2.52 × 10<sup>-5</sup>). In tier 2b, we also selected for genotyping, additional borderline significant (P < .05) in tier 1 but that tested a prior biological or genetic hypothesis (P < .05) in tier 2b. In analysis of the combined tier 1 and tier 2b data, the two SNPs with the lowest P values (P = 9.07 × 10<sup>-6</sup>; P = 2.96 × 10<sup>-5</sup>) tagged the PARK10 late-onset PD susceptibility locus. Independent replication across populations will clarify the role of the genomic loci tagged by these SNPs in conferring PD susceptibility.

Top-level summary

Marker details

**Phenotype summary**

**GWAS Central Identifier** HGVPM126

**Phenotype** Parkinson's disease

**Used in Study** GWAS of Parkinson's disease (HGVST83)

**Description** Sibling pairs that are discordant for Parkinson's Disease.

**Variable type** Not supplied

**Variable unit** Not supplied

**Related links** Not supplied

**Phenotype annotation** MeSH: Parkinson Disease (D010300)

**Phenotypes inferred from OMIM** PARKINSON DISEASE (168600)  
 HPO: Mask-like facies (HP:0000298)  
 HPO: Depression (HP:0000716)  
 HPO: Dementia (HP:0000726)  
 HPO: Personality changes (HP:0000751)  
 HPO: Dysarthria (HP:0001260)  
 HPO: Parkinsonism (HP:0001300)  
 HPO: Tremor (HP:0001337)  
 HPO: Soft voice (HP:0001621)  
 HPO: Rigidity (HP:0002063)  
 HPO: Bradykinesia (HP:0002067)  
 HPO: Hyposmia (HP:0004409)  
 HPO: Short stepped shuffling gait (HP:0007311)

Phenotype details

**Phenotype summary**

The following Phenotypes are defined in this Study. What is a Phenotype?

| Phenotype           | Description                                                |
|---------------------|------------------------------------------------------------|
| Parkinson's disease | Sibling pairs that are discordant for Parkinson's Disease. |
| Parkinson's disease | Not provided                                               |

**Summary** | View | Panels | Phenotypes | Analysis experiments | Association results

**GWAS Central Identifier** HGVST83

**Study name** GWAS of Parkinson's disease

**Total markers imported** 195,214

**Phenotype(s) tested** Parkinson's disease

**Study design** Case and control

**Genotype platforms** Not supplied

**Abstract** We performed a two-tiered, whole-genome association study of Parkinson disease (PD). For tier 1, we individually genotyped 198,345 uniformly spaced and informative single-nucleotide polymorphisms (SNPs) in 443 sibling pairs discordant for PD. For tier 2a, we individually genotyped 1,793 PD-associated SNPs (P < .01 in tier 1) and 300 genomic control SNPs in 332 matched case-unrelated control pairs. We identified 11 SNPs that were associated with PD (P < .01) in both tier 1 and tier 2 samples and had the same direction of effect. For these SNPs, we combined data from the case-unrelated sibling pair (tier 1) and case-unrelated control pair (tier 2) samples and employed a liberalization of the sibling transmission disequilibrium test to calculate odds ratios, 95% confidence intervals, and P values. A SNP within the semaphorin 5A gene (SEMA5A) had the lowest combined P value (P = 7.62 × 10<sup>-6</sup>). The protein encoded by this gene plays an important role in neurogenesis and in neuronal apoptosis, which is consistent with existing hypotheses regarding PD pathogenesis. A second SNP tagged the PARK11 late-onset PD susceptibility locus (P = 1.70 × 10<sup>-5</sup>). In tier 2b, we also selected for genotyping additional SNPs that were borderline significant (P < .05) in tier 1 but that tested a prior biological and genetic hypotheses regarding susceptibility to PD (n=941 SNPs). In analysis of the combined tier 1 and tier 2b data, the two SNPs with the lowest P values (P = 9.07 × 10<sup>-6</sup>; P = 2.96 × 10<sup>-5</sup>) tagged the PARK10 late-onset PD susceptibility locus. Independent replication across populations will clarify the role of the genomic loci tagged by these SNPs in conferring PD susceptibility.

**Submission information**

| Contributor          | Date Submitted | Author? | Submitter? | Source? |
|----------------------|----------------|---------|------------|---------|
| GWAS Central         | 2002-12-09     | ✗       | ✓          | ✗       |
| Maraganore DM et al. | 2002-12-09     | ✓       | ✗          | ✓       |

**Author communication**

| Corresponding author | Date of contact | Response received | Date of response | Type of response |
|----------------------|-----------------|-------------------|------------------|------------------|
| Dennis G. Ballinger  | 2011-03-17      | ✓                 | 2011-03-17       | E-mail bounce    |

**Links** Supplementary data from PMID16252231

Experiment details

**Summary** | View | Panels | Phenotypes | Analysis experiments | Association results

The Study contains 2 Analysis Experiments. What is an Analysis Experiment?

Expand All | Collapse All

Experiment HGVE138

**Association analysis experiment (Tier 1) for Parkinson's disease**

**Phenotype** Parkinson's disease

**Total no. markers imported** 192,227

**Genotype platform(s)**

**Analysis summary**

| Analysis Method     | Result Set               |
|---------------------|--------------------------|
| log-additive method | Trend analysis (HGVR137) |

**Assayed panels used in Experiment**

| Assayed panel name                                                  | No. Individuals | Selected from Sample panel(s)            |
|---------------------------------------------------------------------|-----------------|------------------------------------------|
| Cases (Tier 1: PD)                                                  | 344             | Tier 1 cohort (Discordant sibling-pairs) |
| Controls (Tier 1: Sibling pairs discordant for Parkinson's disease) | 443             | Tier 1 cohort (Discordant sibling-pairs) |

**Related links** Supplementary file 1

**Individual-level data statement** Access to individual-level data must be made to the study authors

**Comments** None

Association results

**Summary** | View | Panels | Phenotypes | Analysis experiments | Association results

Top results to show in data sets: 50

Export all top results as: --choose a format-- Go

Expand All | Collapse All

Data set HGVR137

Top 50 associations for Parkinson's disease (HGVPM126) from data set HGVR137(192,227 in database)

Export as: --choose a format-- Go

Experiment: Association analysis experiment (Tier 1) for Parkinson's disease (HGVE138)

Data set: Trend analysis (HGVR137)

| Rank | Identifier   | Accession  | Region                   | p-value    | -log p-value | Effect size  | Risk allele  | Related data | Links        |
|------|--------------|------------|--------------------------|------------|--------------|--------------|--------------|--------------|--------------|
| 1    | HGVM2262419  | rs3746736  | chr20:23424613..23424613 | 1.301e-05  | 4.886        | Not supplied | Not supplied | Details      | Not supplied |
| 2    | HGVM420277   | rs1472402  | chr12:42263030..42263030 | 1.4409e-05 | 4.841        | Not supplied | Not supplied | Details      | Not supplied |
| 3    | HGVM3067273  | rs10197606 | chr2:41878796..41878796  | 1.9528e-05 | 4.709        | Not supplied | Not supplied | Details      | Not supplied |
| 4    | HGVM13206713 | rs17463995 | chr15:49003772..49003772 | 3.4967e-05 | 4.456        | Not supplied | Not supplied | Details      | Not supplied |
| 5    | HGVM18052891 | rs16887478 | chr8:38442043..38442043  | 3.6351e-05 | 4.439        | Not supplied | Not supplied | Details      | Not supplied |
| 6    | HGVM4532217  | rs11887431 | chr2:42267462..42267462  | 3.6577e-05 | 4.437        | Not supplied | Not supplied | Details      | Not supplied |
| 7    | HGVM4319177  | rs11674789 | chr2:41911100..41911100  | 3.7598e-05 | 4.425        | Not supplied | Not supplied | Details      | Not supplied |
| 8    | HGVM1020790  | rs1984279  | chr20:23313192..23313192 | 3.8852e-05 | 4.411        | Not supplied | Not supplied | Details      | Not supplied |
| 9    | HGVM3521330  | rs10815285 | chr9:5814424..5814424    | 4.6376e-05 | 4.334        | Not supplied | Not supplied | Details      | Not supplied |
| 10   | HGVM19101008 | rs17344386 | chr1:83541990..83541990  | 4.7053e-05 | 4.327        | Not supplied | Not supplied | Details      | Not supplied |

Marker details

**Summary** | Association results

**GWAS Central marker ID** HGVM2262419

**Marker accession ID** rs3746736

**Variation type** SNP

**Observed alleles** 5' upstream 30bp (allele seq) 3' downstream 30bp

GTGGAGTATATAGTCACCTGTGAAGATTGGC (C) GGACCAAAATGCAAGAGGAATGACACGAGCA

GTGGAGTATATAGTCACCTGTGAAGATTGGC (T) GGACCAAAATGCAAGAGGAATGACACGAGCA

**Genomic location** chr20:23,424,613..23,424,613 (view in genome browser: Ensembl | UCSC)

**Mapped gene** CSTL1[exonic]

**Marker status and Revision History** This marker is currently ACTIVE (no revision history)

**Cross-references** None available

**Links** OMIM  
SNPedia  
dbSNP
