# Supplementary material for: GWAS Central: a comprehensive resource for the comparison and interrogation of genome-wide association studies
Source: Springer Nature journal article supplement (doi:10.1038/ejhg.2013.274), 2013-12-04

MeSH disease categories

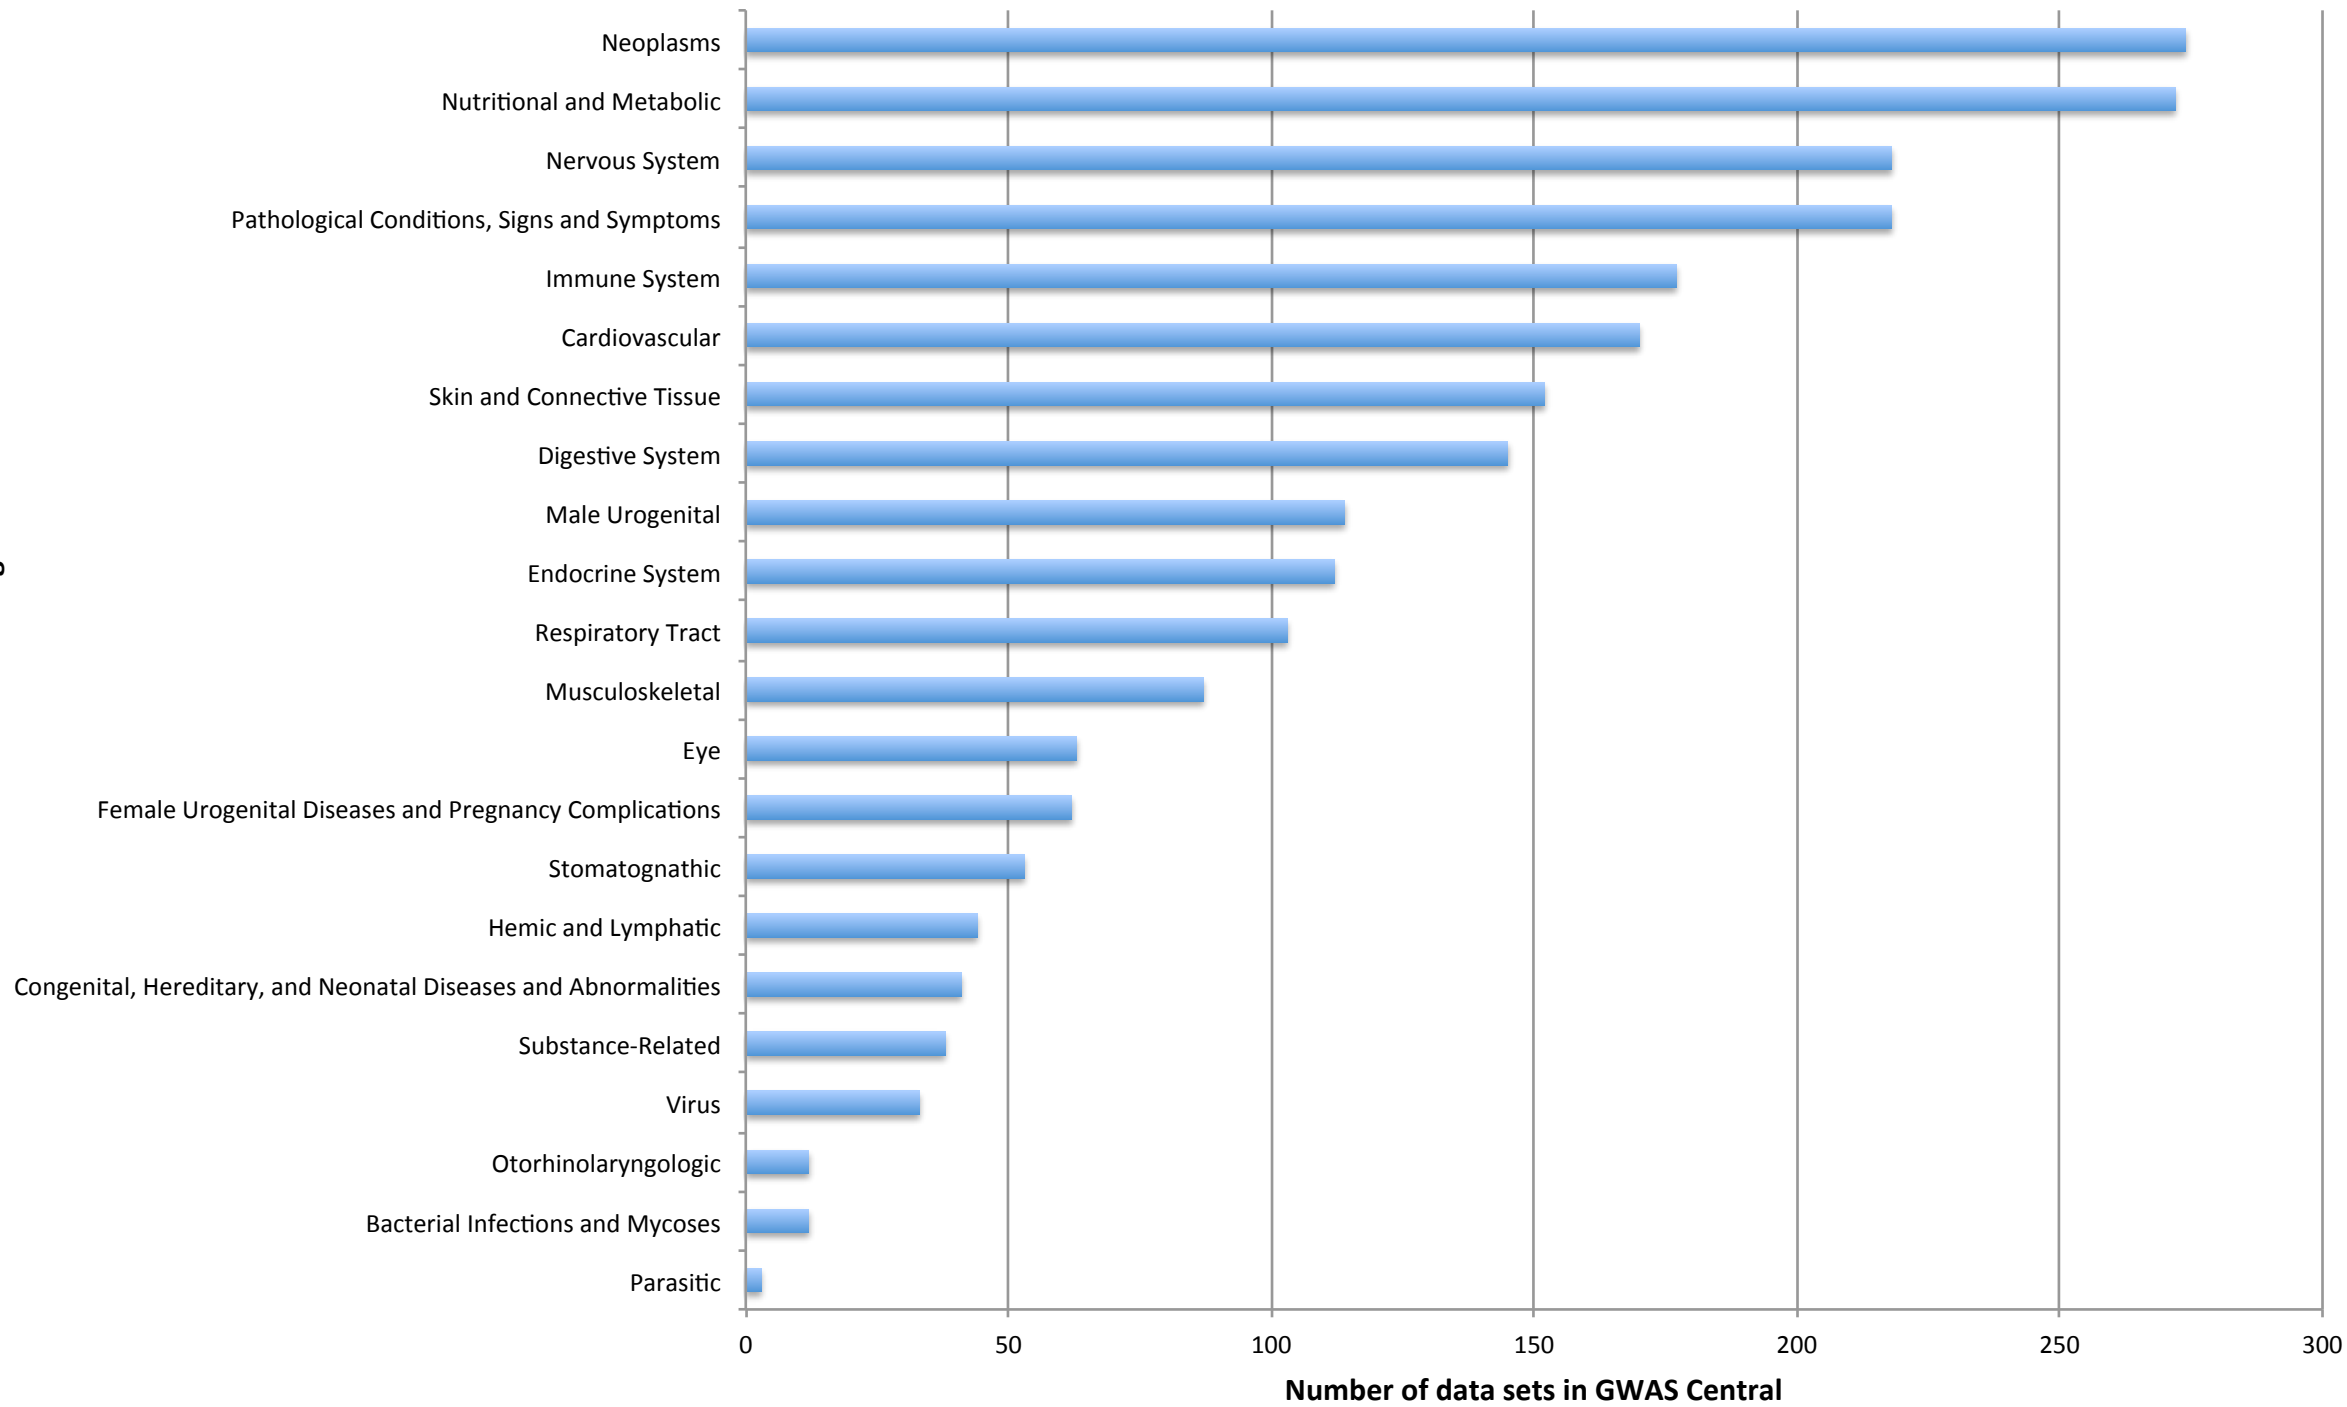

Supplement: 41431_2014_BFejhg2013274_MOESM24_ESM.pdf [file 41431_2014_BFejhg2013274_MOESM24_ESM.pdf]
